# Supplementary material for: Temperature Sensitivity of Soil Respiration in Two Temperate Forest Ecosystems: The Synthesis of a 24-Year Continuous Observation
Source: MDPI journal article supplement (doi:10.3390/f13091374), 2022-08-28
Supplement: s1 [file s1]

**Table S1.** Statistical characteristics for meteorological indexes for the observation period ( $n = 24$ ).

| Characteristics      | MAT  | ST <sub>5-8</sub> | ST <sub>5-9</sub> | SP   | SP <sub>5-8</sub> | SP <sub>5-9</sub> | WI <sub>5-8</sub> | WI <sub>5-9</sub> | HTC <sub>6-8</sub> |
|----------------------|------|-------------------|-------------------|------|-------------------|-------------------|-------------------|-------------------|--------------------|
|                      | °C   |                   |                   | mm   |                   |                   |                   |                   |                    |
| ClimNorm (1991-2020) | 5.4  | 65                | 76                | 640  | 276               | 333               | 0.61              | 0.62              | 1.37               |
| Mean                 | 5.9  | 66                | 78                | 650  | 280               | 340               | 0.61              | 0.63              | 1.34               |
| Median               | 6.0  | 65                | 77                | 665  | 266               | 314               | 0.63              | 0.61              | 1.46               |
| Min                  | 4.0  | 60                | 70                | 400  | 130               | 209               | 0.30              | 0.41              | 0.68               |
| Max                  | 7.6  | 81                | 92                | 929  | 444               | 599               | 0.85              | 0.87              | 2.23               |
| Range (Max – Min)    | 3.6  | 21                | 22                | 529  | 313               | 390               | 0.55              | 0.46              | 1.54               |
| STD                  | 0.8  | 4.7               | 4.8               | 122  | 84                | 95                | 0.15              | 0.13              | 0.45               |
| SE                   | 0.2  | 0.97              | 0.99              | 25   | 17                | 19                | 0.03              | 0.03              | 0.09               |
| CI                   | 0.3  | 2.00              | 2.04              | 51   | 35                | 40                | 0.06              | 0.05              | 0.19               |
| CV, %                | 14   | 7.1               | 6.2               | 19   | 30                | 28                | 25                | 20                | 34                 |
| Cos (Range/Mean)     | 0.61 | 0.32              | 0.28              | 0.81 | 1.12              | 1.15              | 0.90              | 0.74              | 1.15               |

*MAT is a mean annual Tair (°C); SP is an annual sum of precipitation, P (mm); ST<sub>5-8</sub> and ST<sub>5-9</sub> are the sum of mean monthly Tair from May to August and May to September, respectively; SP<sub>5-8</sub> and SP<sub>5-9</sub> are the sum of monthly P from May to August and May to September, respectively; wetness indexes WI<sub>5-8</sub> and WI<sub>5-9</sub> are the ratio  $\lg SP_{5-8}/ST_{5-8}$  and  $\lg SP_{5-9}/ST_{5-9}$ ; HTC<sub>6-8</sub> is the Selyaninov hydrothermal coefficient over the summer period (June–August); ClimNo – Climatological Norm is a mean value for each meteorological index over period between 1991 – 2020; Mean, Median, Min, Max are mean, median, minimal, and maximal values, respectively; Range is the difference between Max and Min; STD is standard deviation; SE is standard error; CI – is a confidence interval, CV is coefficient of variation; Cos is a ratio between Range and Mean (coefficient oscillation).*

**Table S2.** Ranks of meteorological indexes for calculation of the Spearman's correlation coefficient.

| Index                                      | Rank 1 | Rank 2      | Rank 3      | Rank 4      | Rank 5      | Rank 6 |
|--------------------------------------------|--------|-------------|-------------|-------------|-------------|--------|
| Entic Podzol, Mature mixed forest          |        |             |             |             |             |        |
| MAT, °C                                    | < 5.5  | 5.6 - 6.0   | 6.1 - 6.5   | > 6.6       |             |        |
| ST <sub>5-8</sub> , °C                     | < 63   | 63.1 - 66.0 | 66.1 - 69.0 | 69.1 - 72.0 | > 72.1      |        |
| ST <sub>5-9</sub> , °C                     | < 72   | 72.1 - 76.0 | 76.1 - 80.0 | 80.1 - 84.0 | > 84.1      |        |
| SP, mm                                     | < 550  | 551 - 650   | 651 - 750   | >751        |             |        |
| SP <sub>5-8</sub> , mm                     | < 200  | 201 - 260   | 261 - 320   | 321 - 380   | >381        |        |
| SP <sub>5-9</sub> , mm                     | < 260  | 261 - 320   | 321 - 380   | 381 - 440   | >441        |        |
| WI <sub>5-8</sub>                          | < 0.4  | 0.41 - 0.50 | 0.51 - 0.60 | 0.61 - 0.70 | 0.71 - 0.80 | > 0.81 |
| WI <sub>5-9</sub>                          | < 0.5  | 0.51 - 0.60 | 0.61 - 0.70 | 0.71 - 0.80 | > 0.81      |        |
| HTC <sub>6-8</sub>                         | < 0.80 | 0.81 - 1.20 | 1.21 - 1.60 | 1.61 - 2.00 | > 2.00      |        |
| Haplic Luvisol, Secondary deciduous forest |        |             |             |             |             |        |
| MAT, °C                                    | < 5.5  | 5.6 - 6.0   | 6.1 - 6.5   | > 6.6       |             |        |
| SP, mm                                     | < 550  | 551 - 650   | 651 - 750   | >751        |             |        |
| SP <sub>5-8</sub> , mm                     | < 200  | 201 - 260   | 261 - 320   | 321 - 380   | >381        |        |
| SP <sub>5-9</sub> , mm                     | < 260  | 261 - 320   | 321 - 380   | 381 - 440   | >441        |        |
| WI <sub>5-8</sub>                          | < 0.5  | 0.51 - 0.60 | 0.61 - 0.70 | 0.71 - 0.80 | > 0.81      |        |
| WI <sub>5-9</sub>                          | < 0.5  | 0.51 - 0.60 | 0.61 - 0.70 | 0.71 - 0.80 | > 0.81      |        |
| HTC <sub>6-8</sub>                         | < 0.80 | 0.81 - 1.20 | 1.21 - 1.60 | 1.61 - 2.00 | > 2.00      |        |

MAT is a mean annual Tair (°C); ST<sub>5-8</sub> and ST<sub>5-9</sub> are the sum of mean monthly Tair from May to August and May to September, respectively; SP is an annual sum of precipitation; SP<sub>5-8</sub> and SP<sub>5-9</sub> are the sum of monthly P from May to August and May to September, respectively; WI<sub>5-8</sub> and WI<sub>5-9</sub> are the ratio  $\lg SP_{5-8}/ST_{5-8}$  and  $\lg SP_{5-9}/ST_{5-9}$ ; HTC<sub>6-8</sub> is the Selyaninov hydrothermal coefficient.

**Table S3.** Statistical characteristics for  $Q_{10}$  and  $SR_{10}$  values for different temperature intervals ( $n = 24$ ).

|                   | <b>Mixed mature forest, Entic Podzol</b>          |          |             |           |               |
|-------------------|---------------------------------------------------|----------|-------------|-----------|---------------|
| Characteristics   | $Q^*_{10}$                                        | $Q_{10}$ | $SR^*_{10}$ | $SR_{10}$ | $SR_{10-obs}$ |
| Mean              | 2.65                                              | 2.20     | 1.77        | 1.83      | 2.65          |
| Median            | 2.56                                              | 2.25     | 1.70        | 1.70      | 2.56          |
| Min               | 1.58                                              | 1.42     | 1.15        | 1.23      | 1.58          |
| Max               | 5.04                                              | 3.15     | 2.86        | 2.93      | 5.04          |
| Range (Max – Min) | 3.46                                              | 1.73     | 1.71        | 1.70      | 3.46          |
| STD               | 0.88                                              | 0.50     | 0.41        | 0.44      | 0.88          |
| SE                | 0.18                                              | 0.10     | 0.08        | 0.09      | 0.18          |
| CI                | 0.37                                              | 0.21     | 0.17        | 0.19      | 0.37          |
| CV, %             | 33.0                                              | 22.8     | 23.3        | 24.2      | 33.0          |
| Cos (Range/Mean)  | 1.31                                              | 0.78     | 0.97        | 0.93      | 1.31          |
|                   | <b>Secondary deciduous forest, Haplic Luvisol</b> |          |             |           |               |
| Mean              | 2.37                                              | 1.91     | 1.77        | 1.87      | 2.07          |
| Median            | 2.19                                              | 1.90     | 1.72        | 1.87      | 2.05          |
| Min               | 1.48                                              | 1.33     | 1.10        | 1.17      | 1.26          |
| Max               | 6.29                                              | 2.74     | 2.65        | 2.65      | 3.28          |
| Range (Max – Min) | 4.81                                              | 1.40     | 1.55        | 1.49      | 2.01          |
| STD               | 0.97                                              | 0.34     | 0.39        | 0.39      | 0.51          |
| SE                | 0.20                                              | 0.07     | 0.08        | 0.08      | 0.10          |
| CI                | 0.41                                              | 0.14     | 0.17        | 0.16      | 0.22          |
| CV, %             | 40.7                                              | 17.8     | 22.3        | 20.8      | 24.7          |
| Cos (Range/Mean)  | 2.03                                              | 0.73     | 0.88        | 0.79      | 0.97          |

$Q^*_{10}$  and  $Q_{10}$  are the temperature coefficient for soil respiration at all range of soil temperature,  $T_s$  and for  $T_s > 1^\circ\text{C}$ , respectively;  $SR^*_{10}$  and  $SR_{10}$  are the rate of soil respiration at  $10^\circ\text{C}$  ( $\text{g C/m}^2/\text{hour}$ ) calculated with using  $Q_{10}$  values;  $SR_{10-obs}$  is the observed rate of soil respiration at  $10^\circ\text{C}$  ( $\text{g C/m}^2/\text{day}$ ). Mean, Median, Min, Max are mean, median, minimal, and maximal values, respectively; Range is the difference between Max and Min; STD is standard deviation; SE is standard error; CI is a confidence interval, CV is coefficient of variation; Cos is a ratio between Range and Mean (coefficient oscillation).

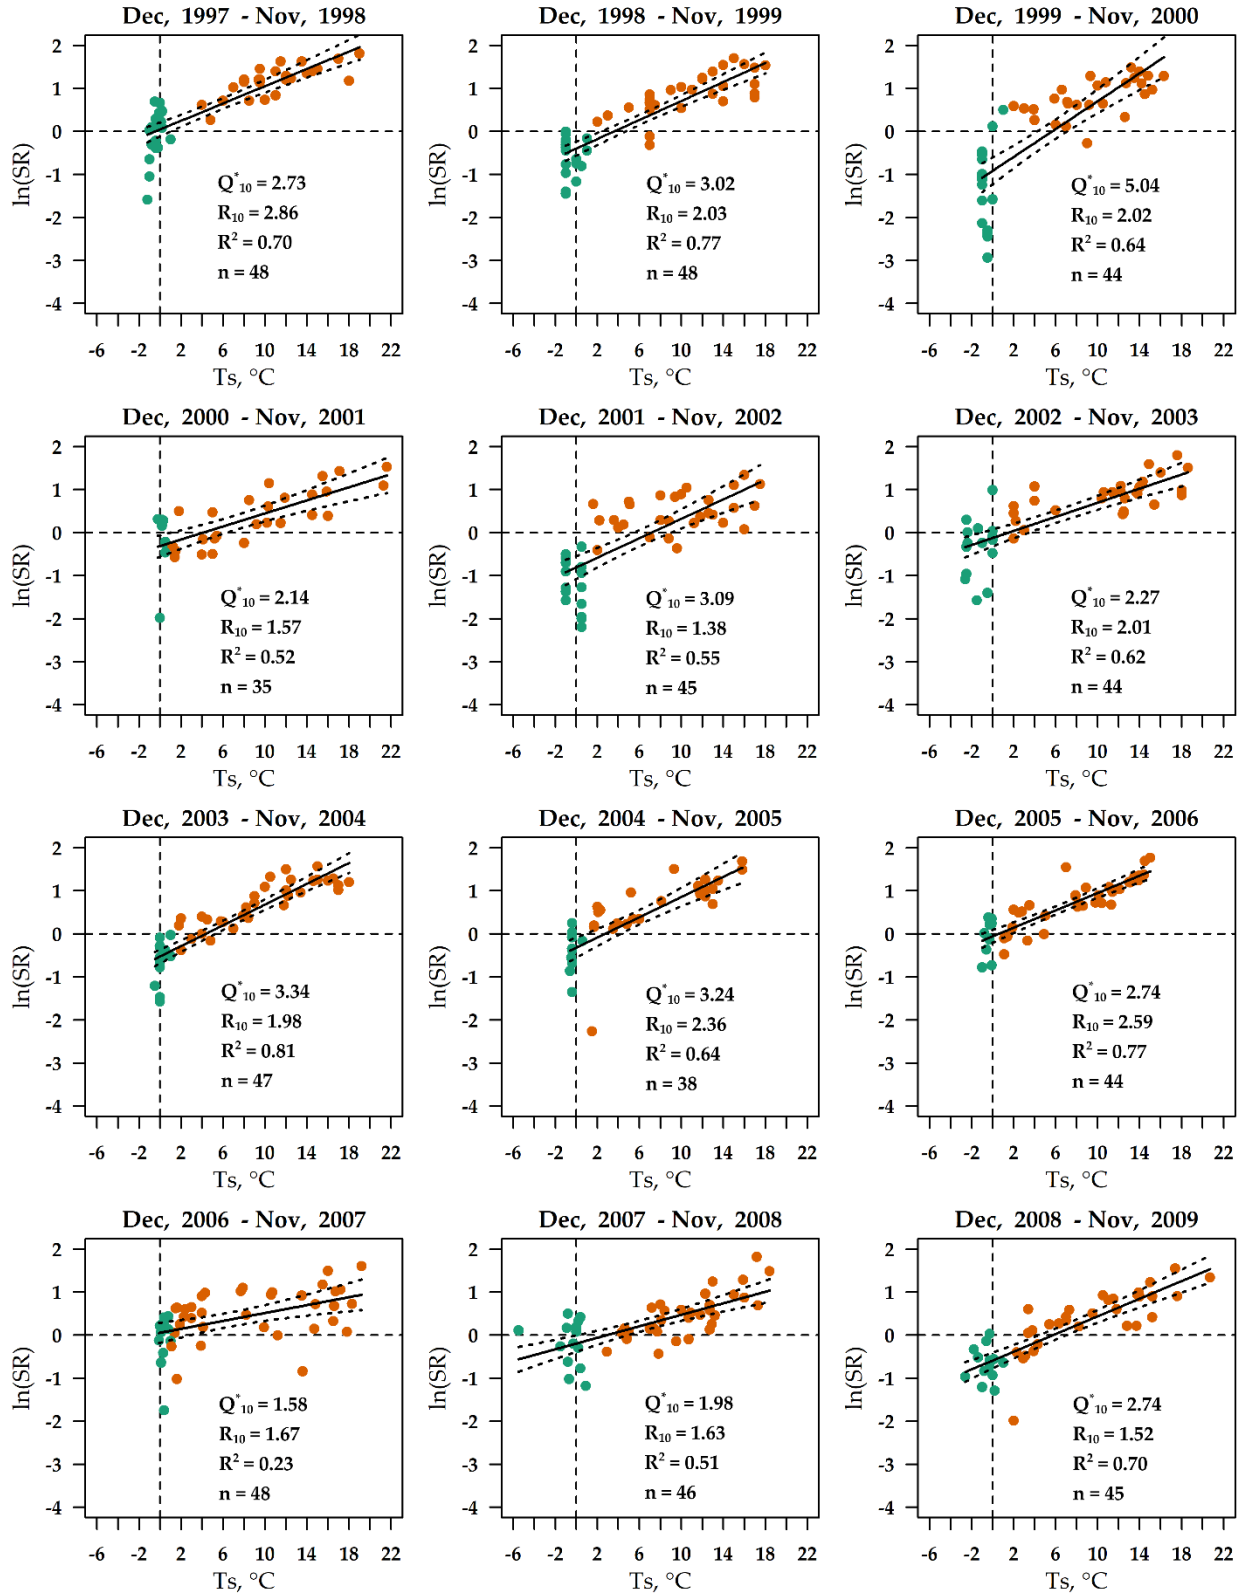

**Figure S1.** Correlation between logarithmic function of soil respiration rate ( $\ln(\text{SR})$ ) and soil temperatures at 5 cm ( $T_s$ ) at the full range of  $T_s$  in sandy Entic Podzol in 1998–2009. The solid lines present the  $Q_{10}^*$  fit of the selected dataset; the dotted lines correspond to the standard error. All regressions are statistically significant at  $P < 0.001$ . In each plot, the  $Q_{10}^*$ ,  $R_{10}$ , the number of measurements ( $n$ ), and  $R^2$  of the regression are given. Green circles correspond to the measurements at  $T_s < 1^\circ\text{C}$ , red circles correspond to the measurements at  $T_s \geq 1^\circ\text{C}$ .

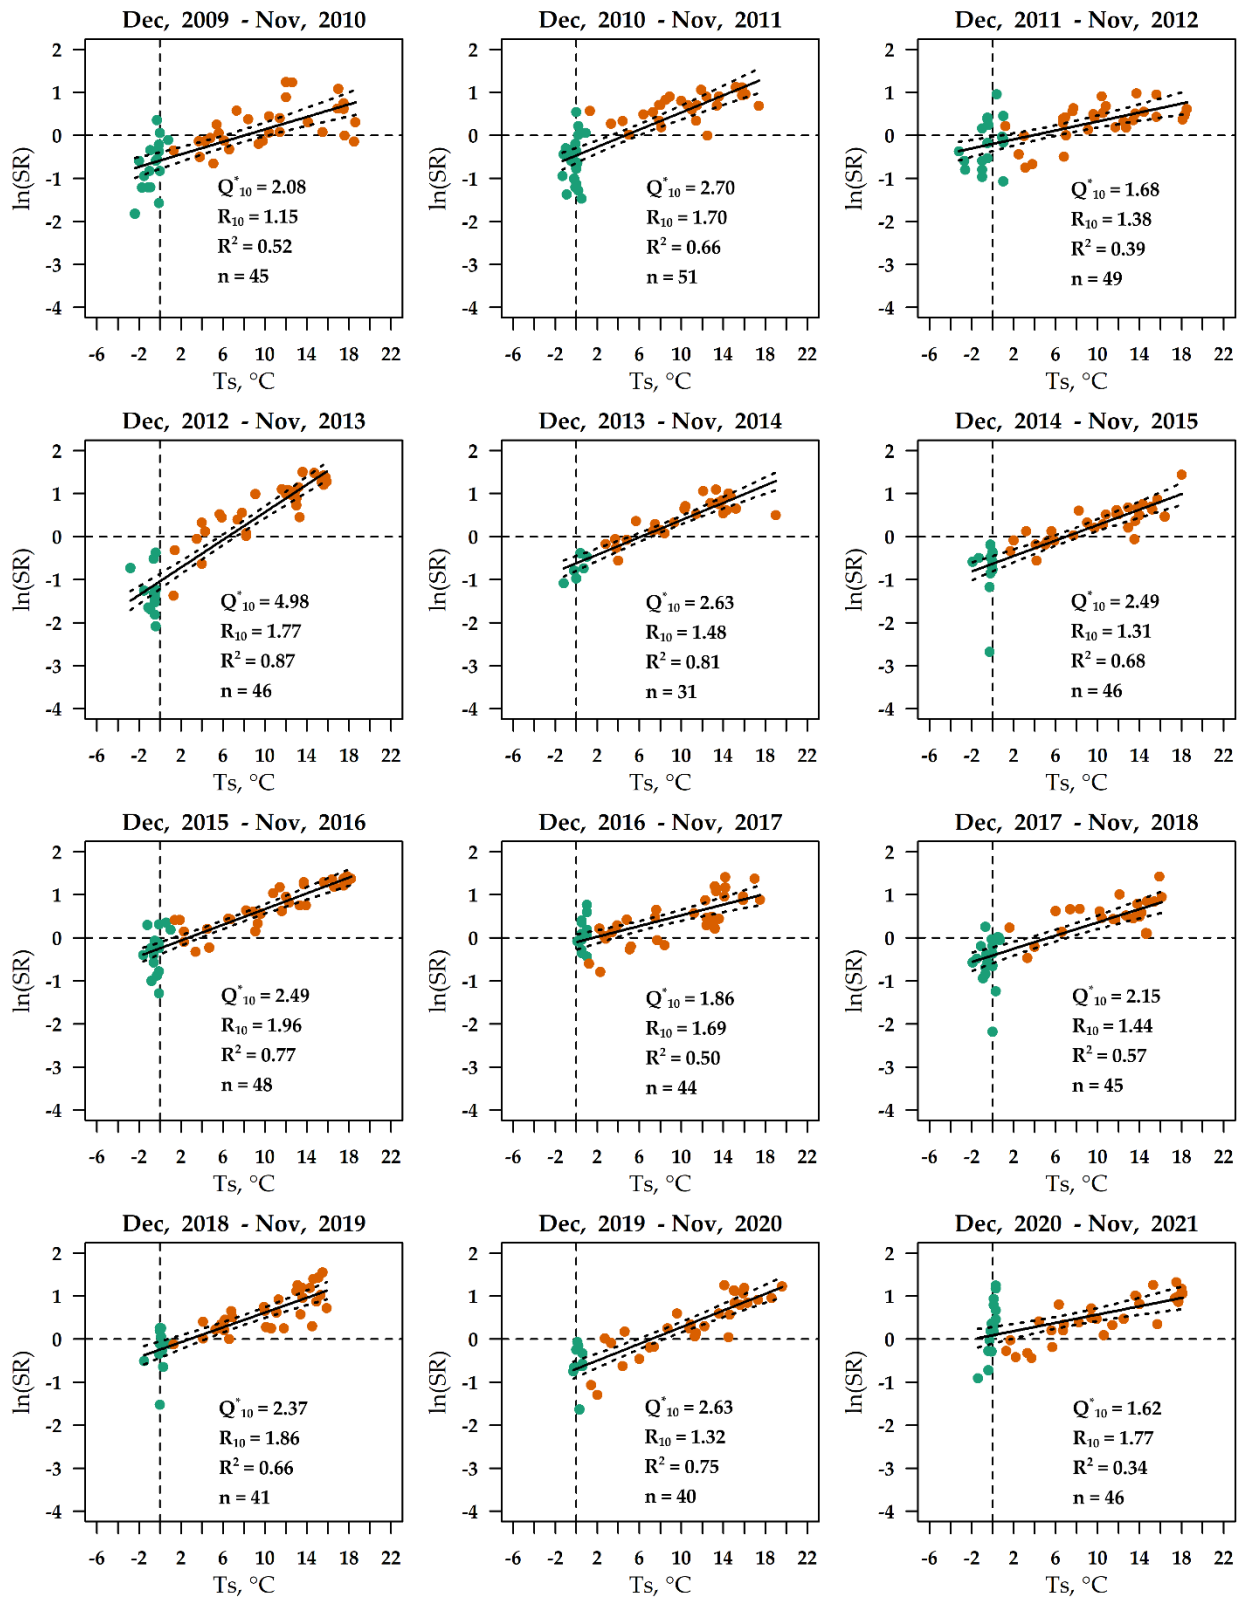

**Figure S2.** Correlation between logarithmic function of soil respiration rate ( $\ln(\text{SR})$ ) and soil temperatures at 5 cm ( $T_s$ ) at the full range of  $T_s$  in sandy Entic Podzol in 2010–2021. The solid lines present the  $Q^*_{10}$  fit of the selected dataset; the dotted lines correspond to the standard error. All regressions are statistically significant at  $P < 0.001$ . In each plot, the  $Q^*_{10}$ ,  $R_{10}$ , the number of measurements ( $n$ ), and  $R^2$  of the regression are given. Green circles correspond to the measurements at  $T_s < 1^\circ\text{C}$ , red circles correspond to the measurements at  $T_s \geq 1^\circ\text{C}$ .

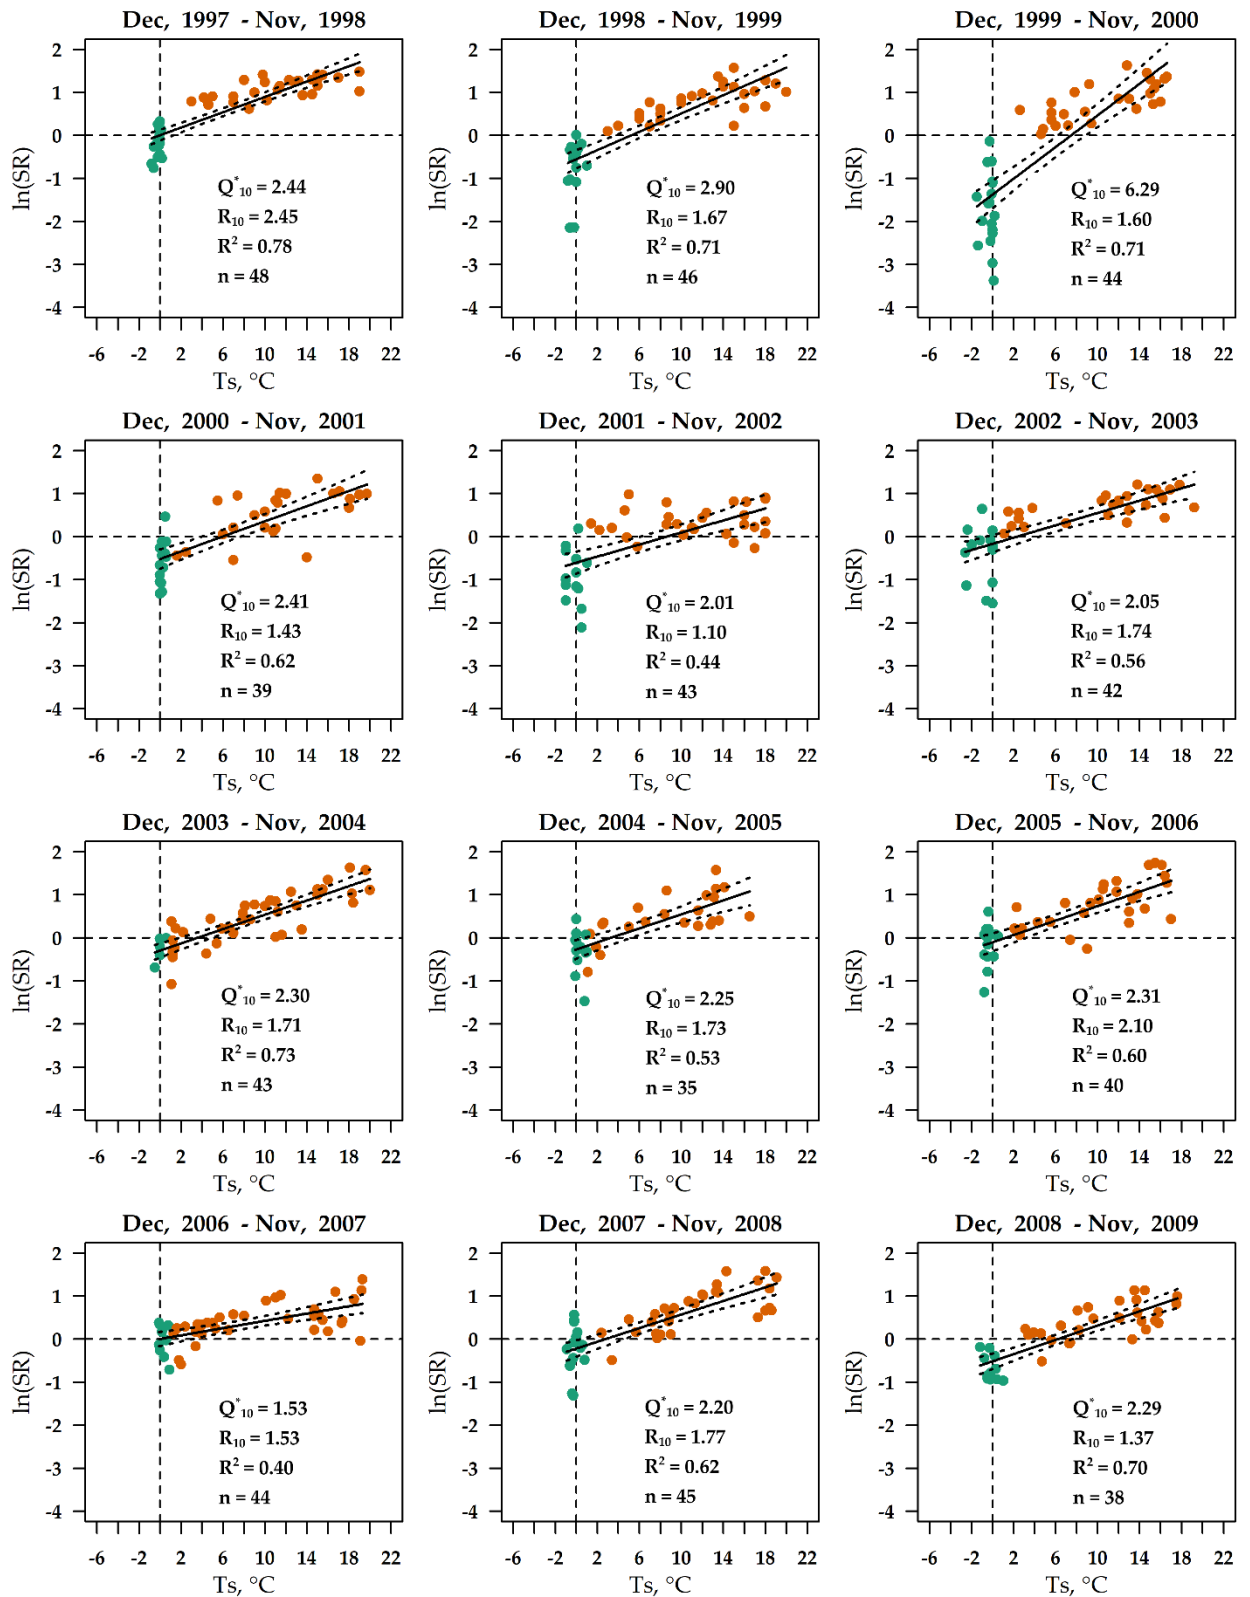

**Figure S3.** Correlation between logarithmic function of soil respiration rate ( $\ln(\text{SR})$ ) and soil temperatures at 5 cm ( $T_s$ ) at the full range of  $T_s$  in clay Haplic Luvisol in 1998–2009. The solid lines present the  $Q^*_{10}$  fit of the selected dataset; the dotted lines correspond to the standard error. All regressions are statistically significant at  $P < 0.001$ . In each plot, the  $Q^*_{10}$ ,  $R^*_{10}$ , the number of measurements ( $n$ ), and  $R^2$  of the regression are given. Green circles correspond to the measurements at  $T_s < 1^\circ\text{C}$ , red circles correspond to the measurements at  $T_s \geq 1^\circ\text{C}$ .

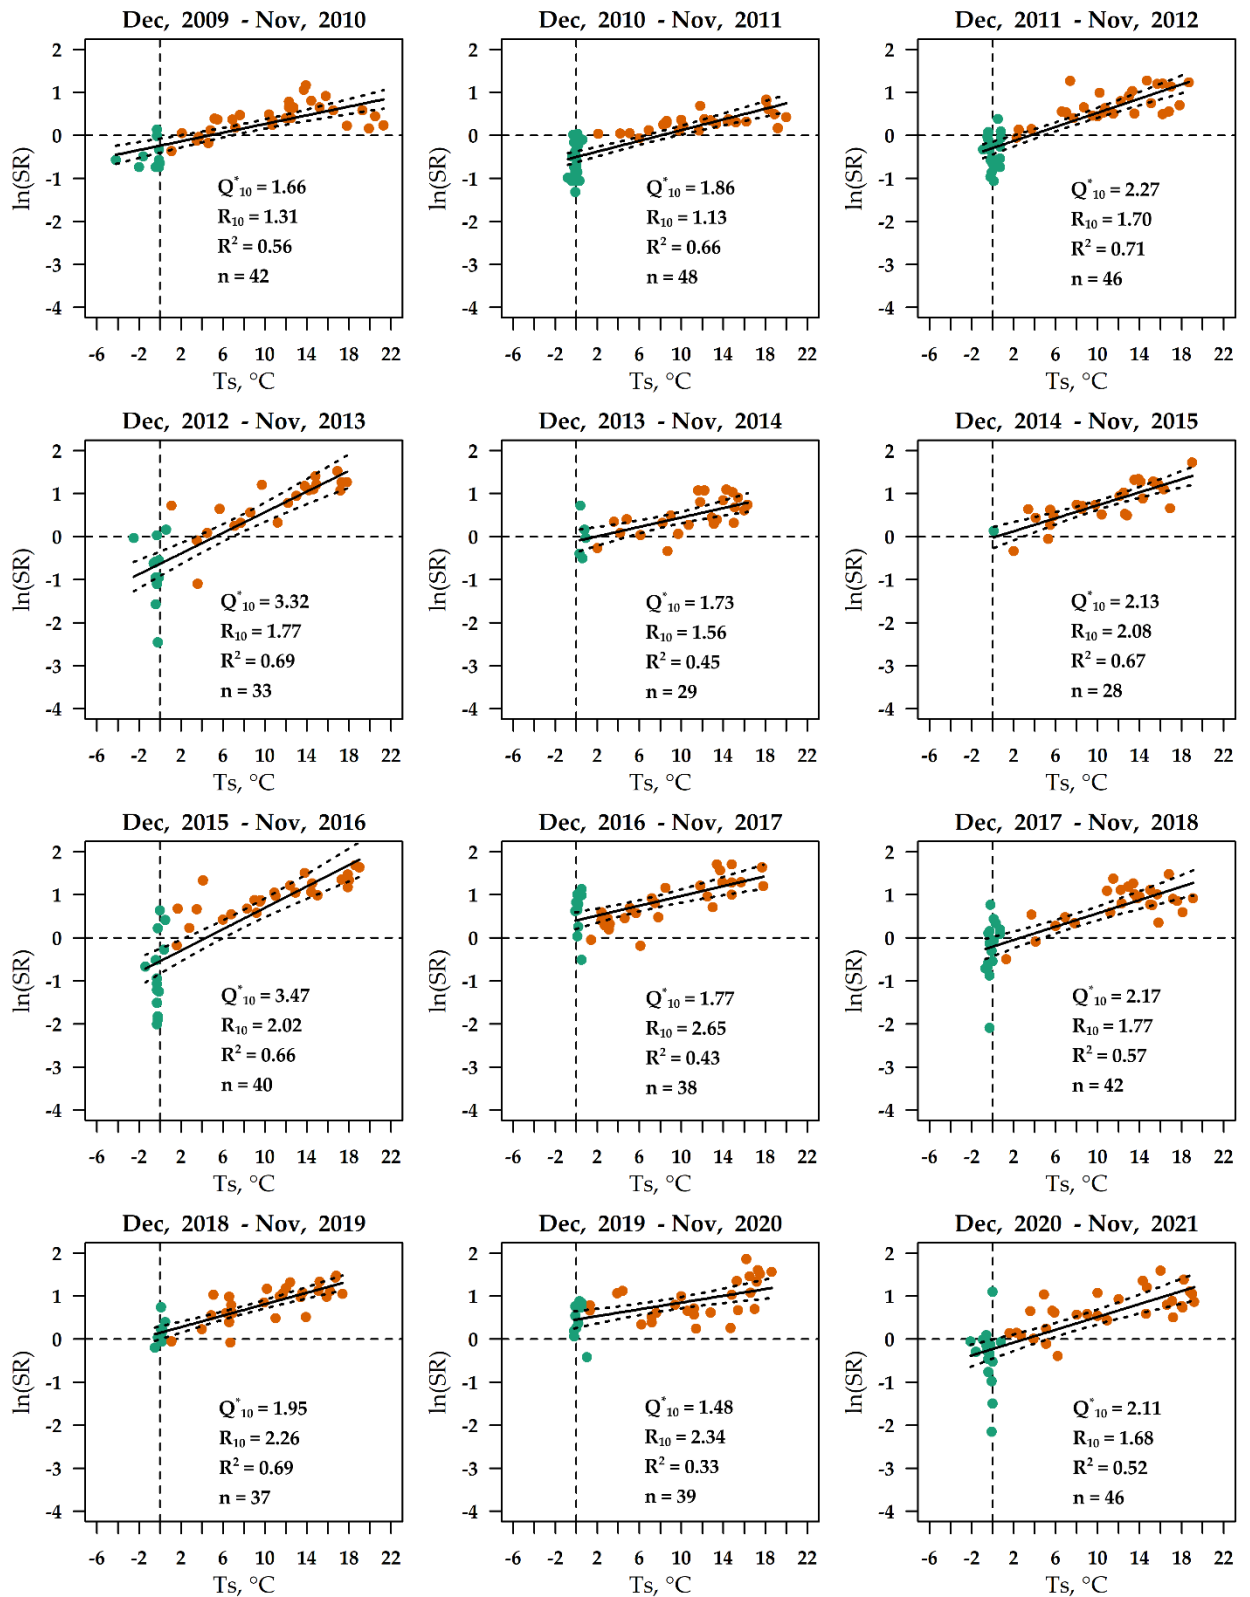

**Figure S4.** Correlation between logarithmic function of soil respiration rate ( $\ln(\text{SR})$ ) and soil temperatures at 5 cm ( $T_s$ ) at the full range of  $T_s$  in clay Haplic Luvisol in 2010–2021. The solid lines present the  $Q^*_{10}$  fit of the selected dataset; the dotted lines correspond to the standard error. All regressions are statistically significant at  $P < 0.001$ . In each plot, the  $Q^*_{10}$ ,  $R^*_{10}$ , the number of measurements ( $n$ ), and  $R^2$  of the regression are given. Green circles correspond to the measurements at  $T_s < 1^\circ\text{C}$ , red circles correspond to the measurements at  $T_s \geq 1^\circ\text{C}$ .

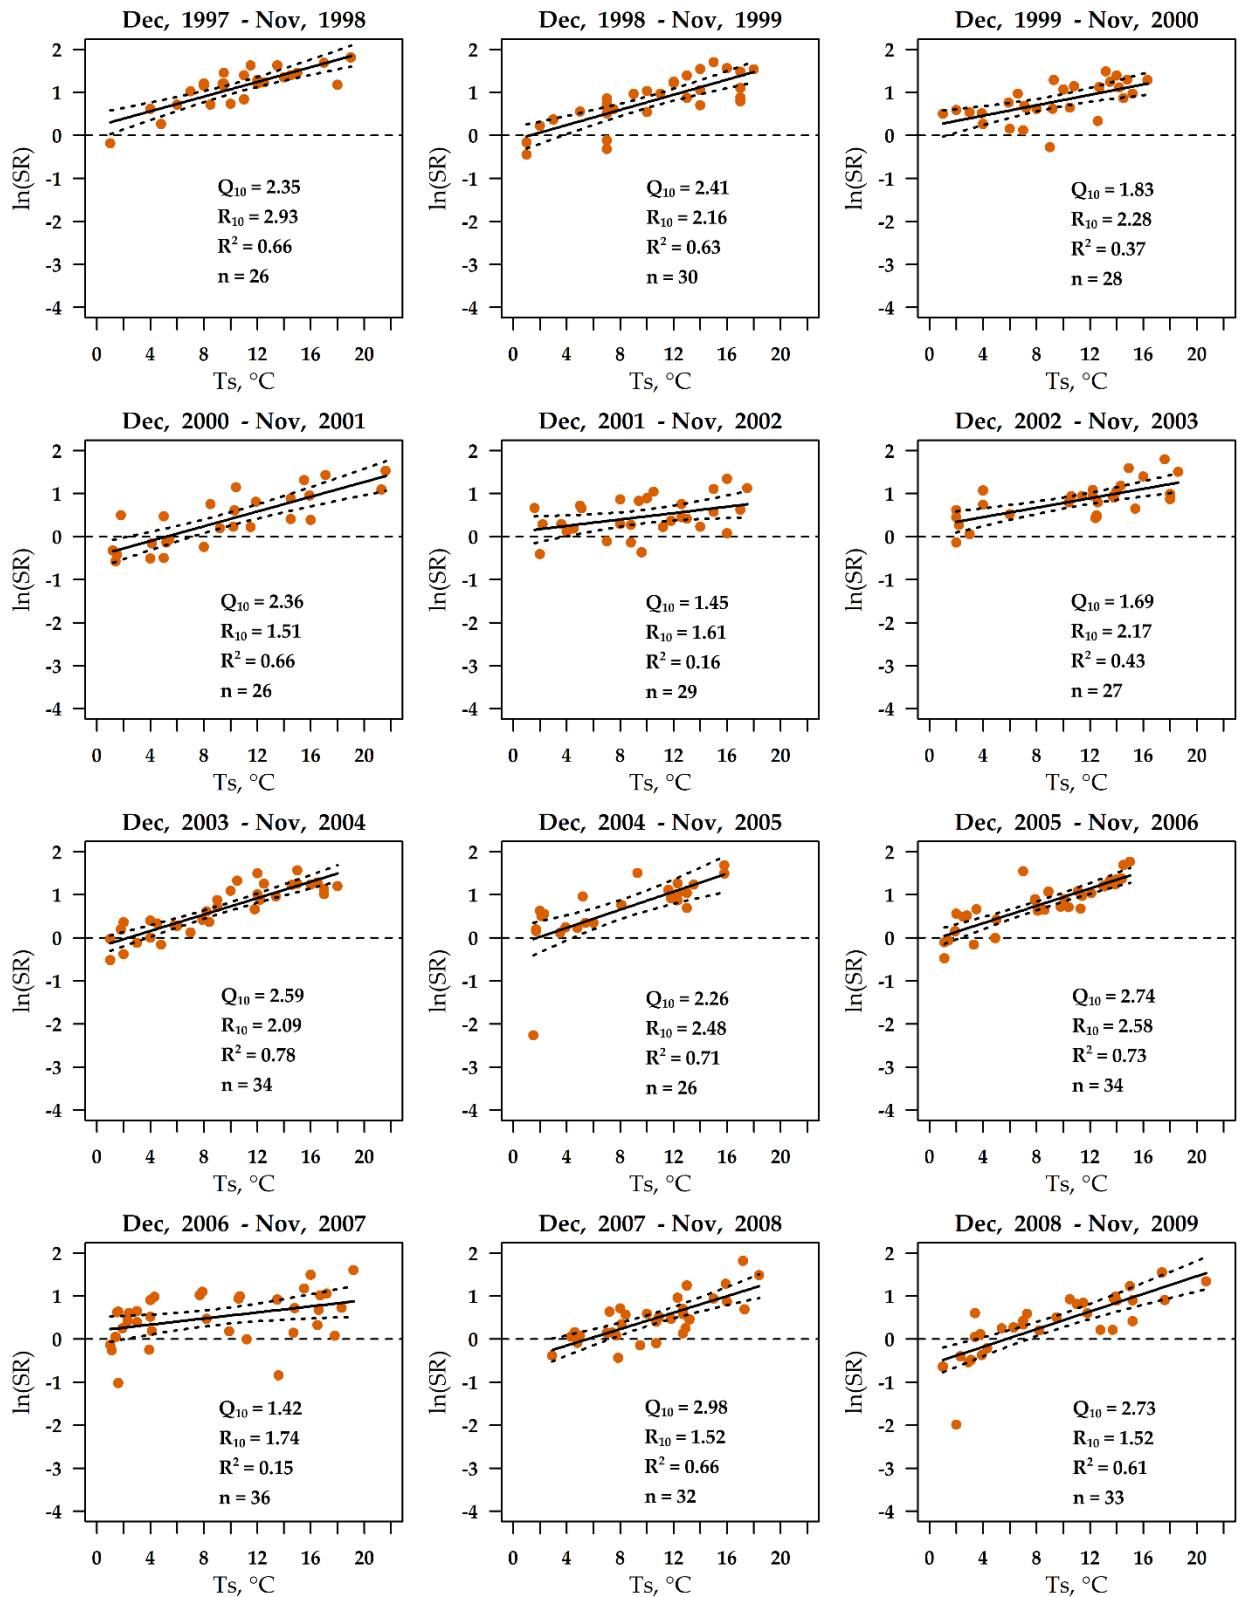

**Figure S 5.** Correlation between logarithmic function of soil respiration rate ( $\ln(\text{SR})$ ) and soil temperatures at 5 cm ( $T_s$ ) at  $T_s \geq 1^\circ\text{C}$  in sandy Entic Podzol in 1998–2009. The solid lines present the  $Q_{10}^*$  fit of the selected dataset; the dotted lines correspond to the standard error. All regressions are statistically significant at  $P < 0.02$ . In each plot, the  $Q_{10}^*$ ,  $R_{10}$ , the number of measurements ( $n$ ), and  $R^2$  of the regression are given.



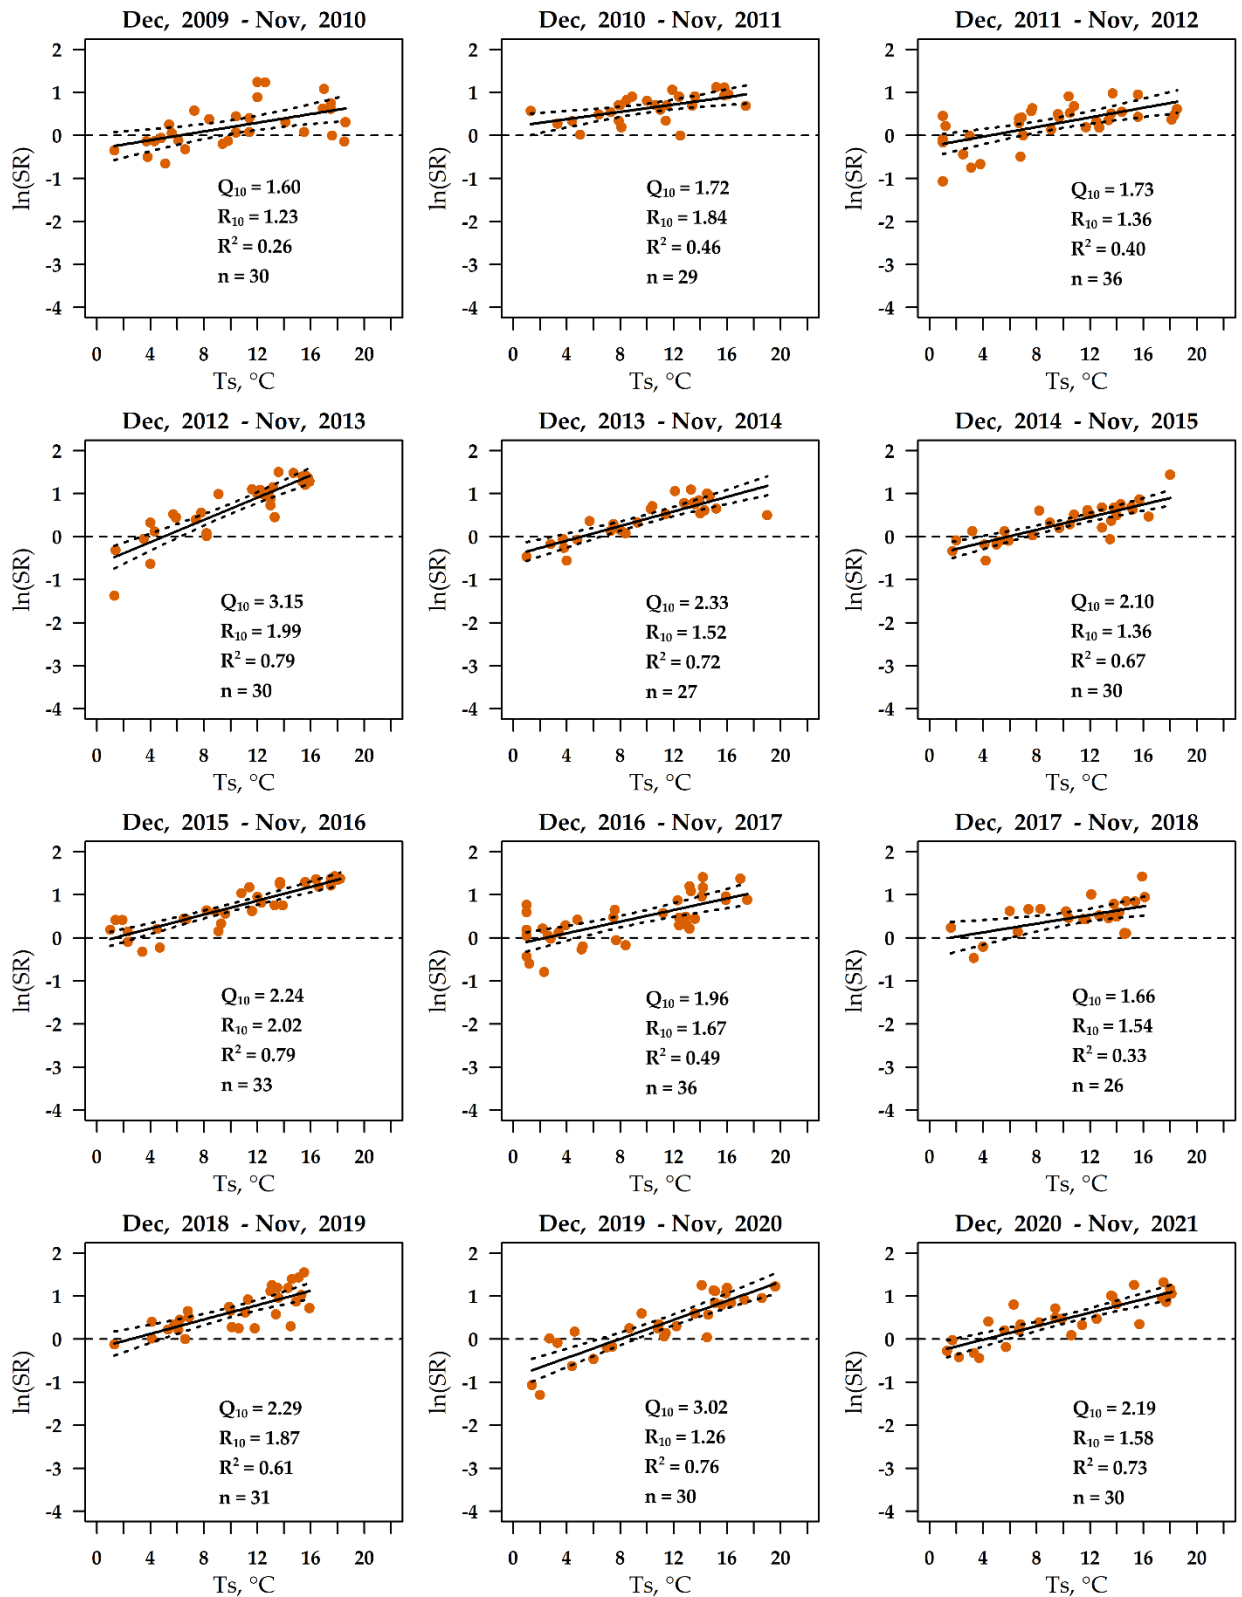

**Figure S6.** Correlation between logarithmic function of soil respiration rate ( $\ln(\text{SR})$ ) and soil temperatures at 5 cm ( $T_s$ ) at  $T_s \geq 1^\circ\text{C}$  in sandy Entic Podzol in 2010–2021. The solid lines present the  $Q_{10}^*$  fit of the selected dataset; the dotted lines correspond to the standard error. All regressions are statistically significant at  $P < 0.005$ . In each plot, the  $Q_{10}^*$ ,  $R_{10}^*$ , the number of measurements ( $n$ ), and  $R^2$  of the regression are given.

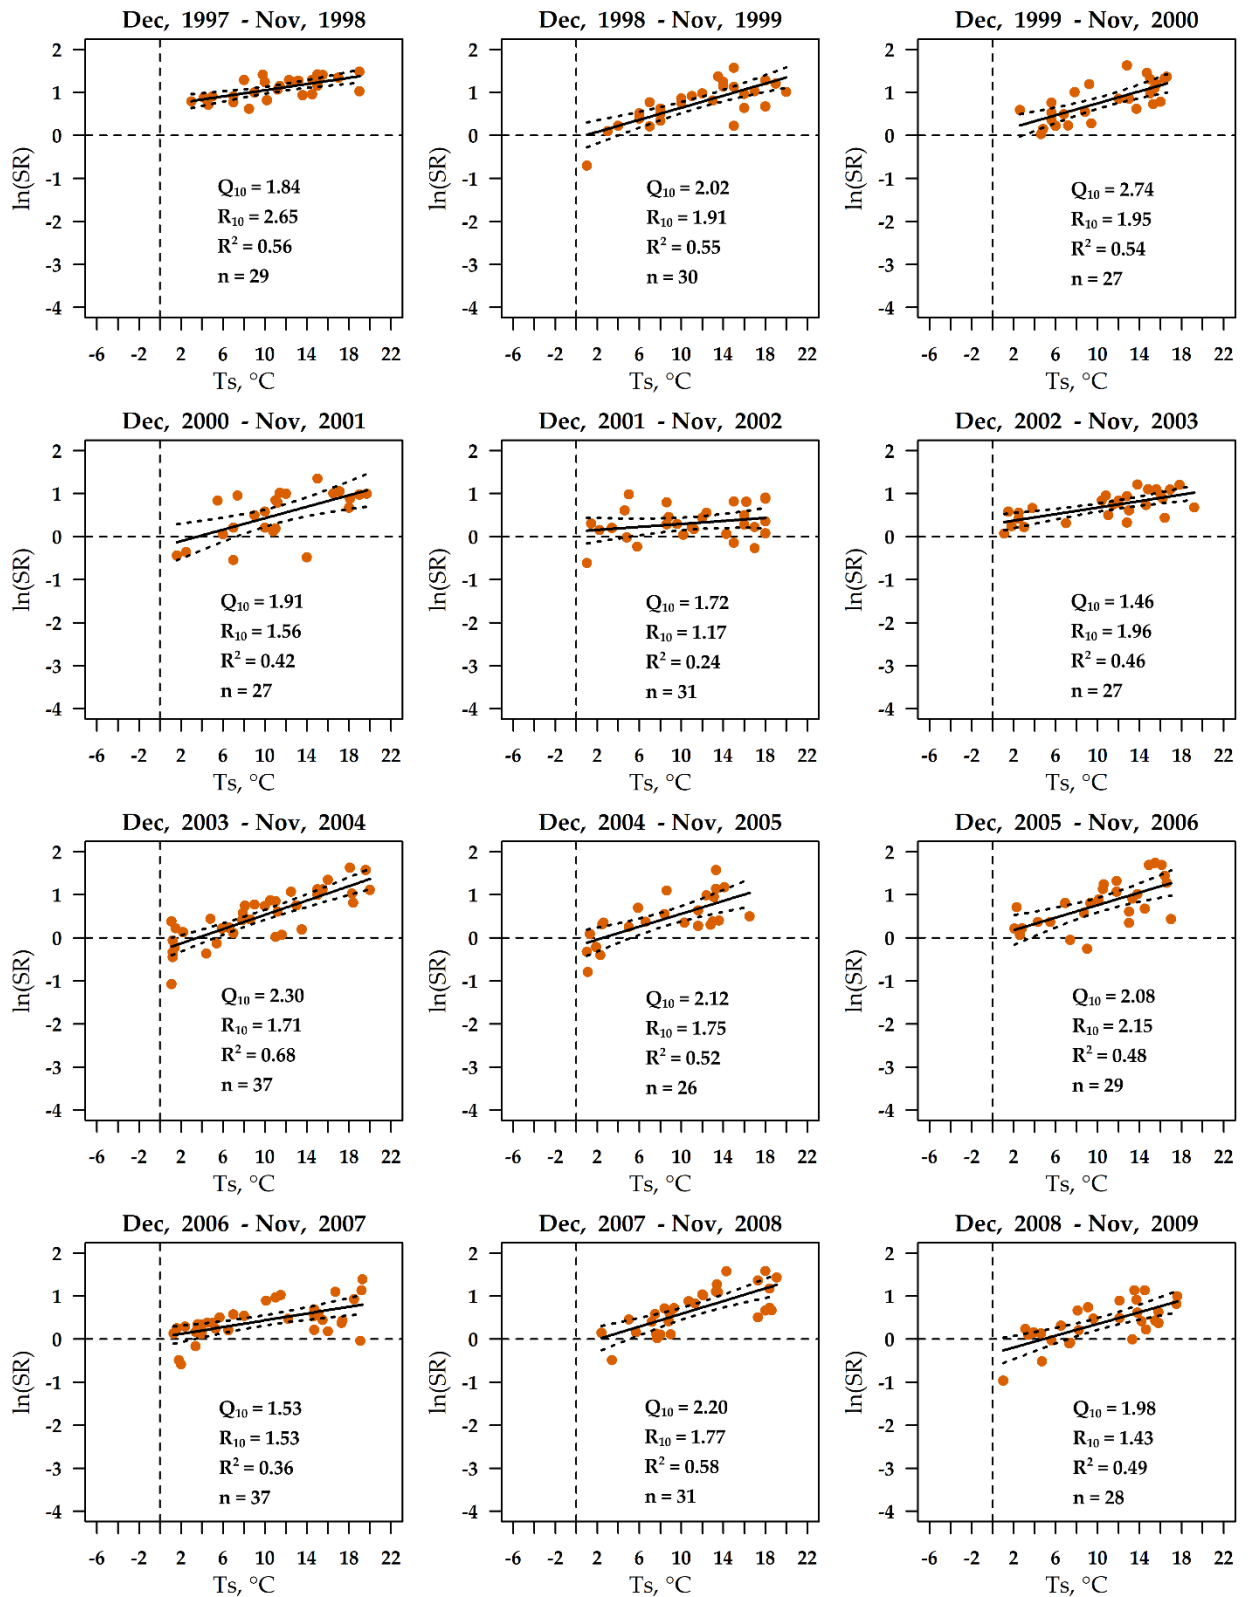

**Figure S7.** Correlation between logarithmic function of soil respiration rate ( $\ln(\text{SR})$ ) and soil temperatures at 5 cm ( $T_s$ ) at  $T_s \geq 1^\circ\text{C}$  in clay Haplic Luvisol in 1998–2009. The solid lines present the  $Q_{10}^*$  fit of the selected dataset; the dotted lines correspond to the standard error. All regressions are statistically significant at  $P < 0.005$ . In each plot, the  $Q_{10}^*$ ,  $R_{10}$ , the number of measurements ( $n$ ), and  $R^2$  of the regression are given.

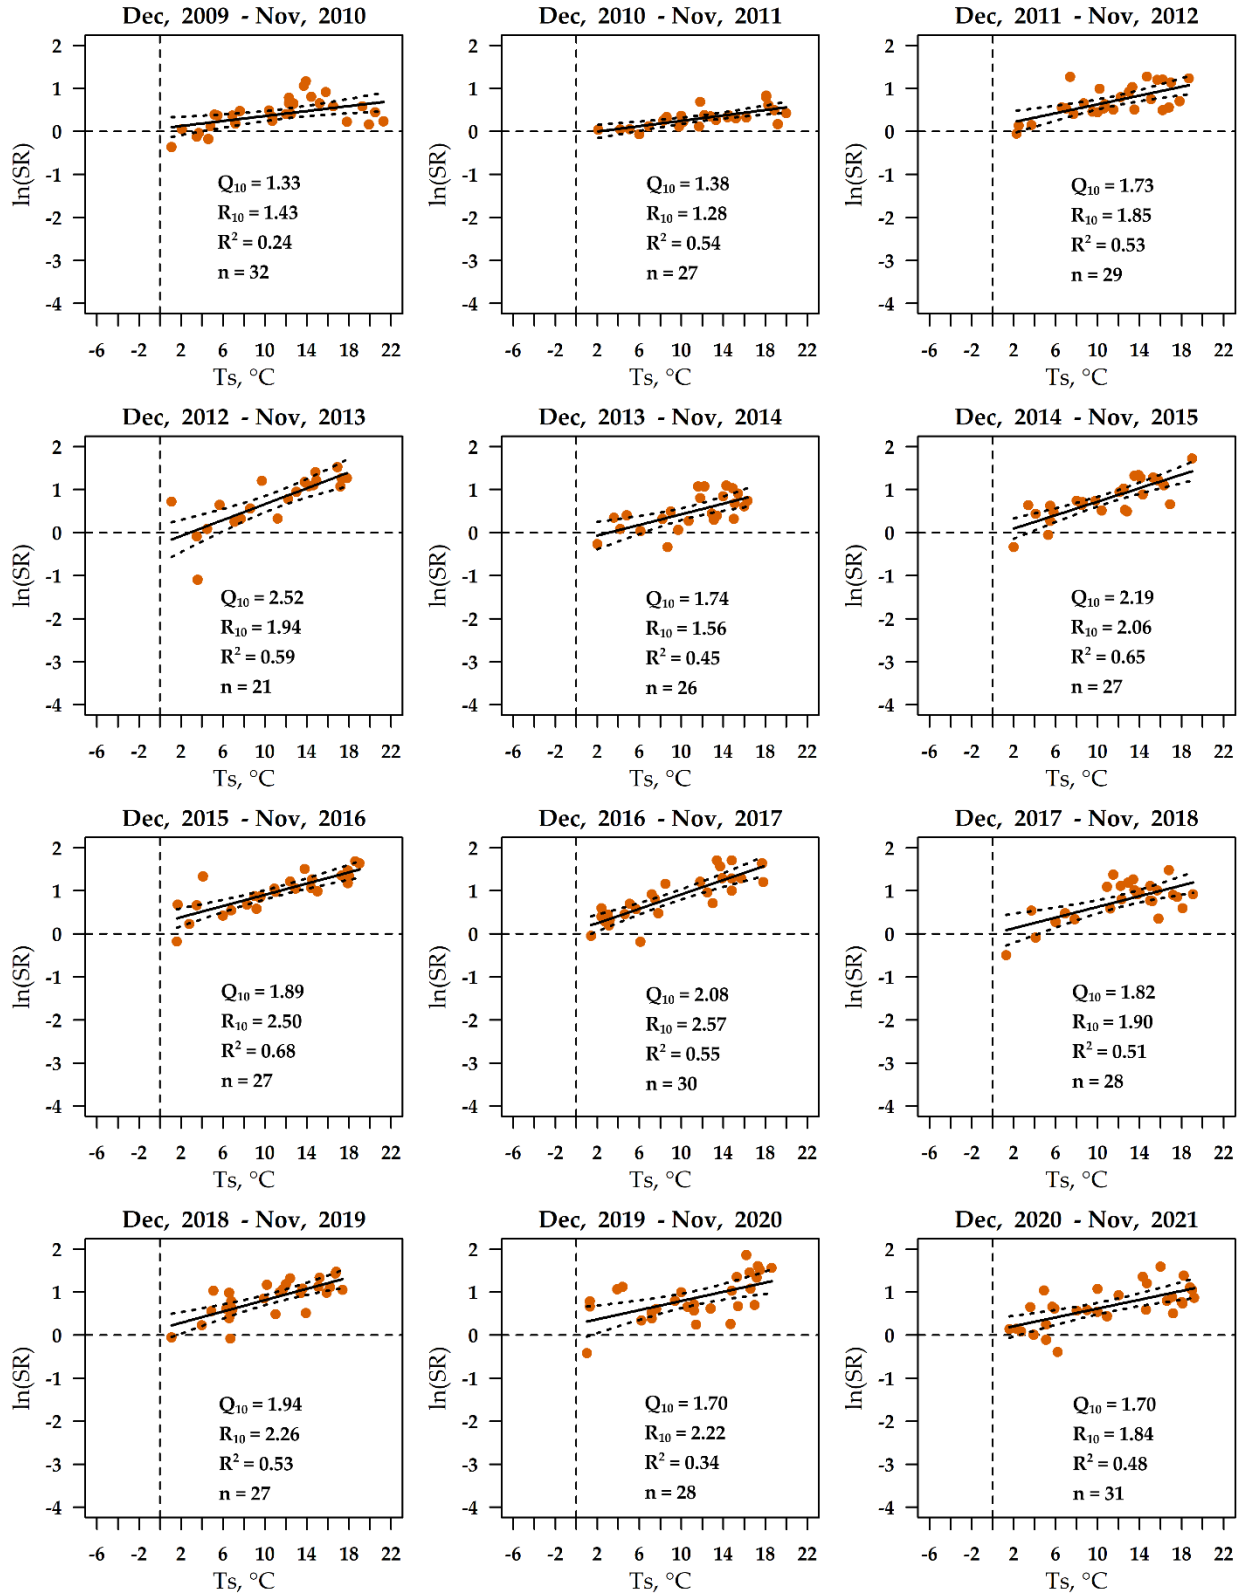

**Figure S8.** Correlation between logarithmic function of soil respiration rate ( $\ln(\text{SR})$ ) and soil temperatures at 5 cm ( $T_s$ ) at  $T_s \geq 1^\circ\text{C}$  in clay Haplic Luvisol in 2010–2021. The solid lines present the  $Q^*_{10}$  fit of the selected dataset; the dotted lines correspond to the standard error. All regressions are statistically significant at  $P < 0.005$ . In each plot, the  $Q^*_{10}$ ,  $R^*_{10}$ , the number of measurements ( $n$ ), and  $R^2$  of the regression are given.
